# Supplementary material for: W-box and G-box elements play important roles in early senescence of rice flag leaf
Source: PubMed Central journal article supplement (PMC4749992; doi:10.1038/srep20881), 2016-02-11
Supplement: srep20881-s1.pdf [file srep20881-s1.pdf]

**W-box and G-box elements play important roles in early senescence  
of rice flag leaf**

**Li Liu<sup>1,2\*</sup>, Wei Xu<sup>1,2</sup>, Xuesong Hu<sup>3</sup>, Haoju Liu<sup>4,5</sup> & Yongjun Lin<sup>5\*</sup>**

<sup>1</sup>Key Laboratory for Economic Plants and Biotechnology, Kunming Institute of Botany, Chinese Academy of Sciences, Kunming, 650201, China

<sup>2</sup>Yunnan Key Laboratory for Wild Plant Resources, Kunming, 650201, China

<sup>3</sup>College of Life Sciences, Peking-Tsinghua Center for Life Sciences, Peking University, Beijing, 100871, China

<sup>4</sup>Department of Bioscience and Bioengineering, Jiangxi Agricultural University, Nanchang, 330045, China

<sup>5</sup>National Key Laboratory of Crop Genetic Improvement and National Centre of Plant Gene Research, Huazhong Agricultural University, Wuhan, 430070, China

To whom correspondence should be addressed. Email: [liulia@mail.kib.ac.cn](mailto:liulia@mail.kib.ac.cn) or [yongjunlin@mail.hzau.edu.cn](mailto:yongjunlin@mail.hzau.edu.cn)

**Supplementary Figure S1. Functional classification of leaf senescence-associated genes in rice flag leaf.** The distribution of GO terms in each category is shown for genes up-regulated (red) and down-regulated (gray) during senescence of flag leaves. Enriched GO terms were identified using WEGO<sup>55</sup>.

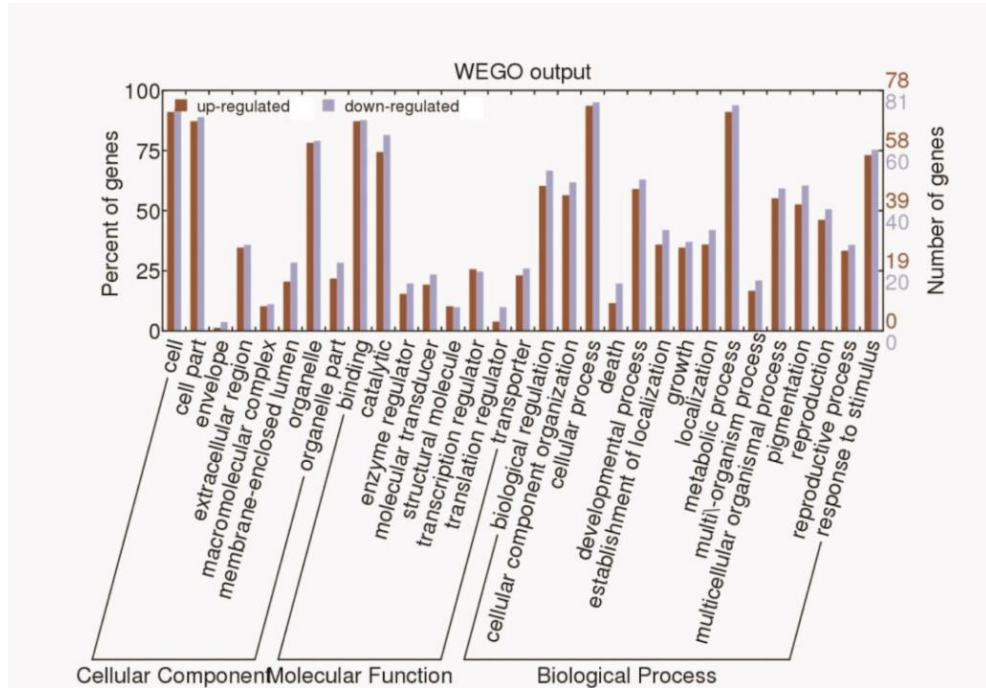

**Supplementary Table S5. Expression pattern of known rice SAGs in flag leaf microarray data.** Asterisks indicate significant differences before to after senescence (*t*-test;  $P < 0.05$ ).

| Name      | Gene ID        | Treatment    |              | Reference |
|-----------|----------------|--------------|--------------|-----------|
|           |                | 5 days       | 14 days      |           |
| OsSGR*    | LOC_Os09g36200 | 151 ± 2      | 1043 ± 66    | 1         |
| OsNYC4*   | LOC_Os07g37250 | 10434 ± 883  | 4652 ± 65    | 2         |
| OsRab7B3* | LOC_Os05g44050 | 10465 ± 1036 | 12908 ± 454  | 3         |
| OsTZF1*   | LOC_Os05g10670 | 3459 ± 95    | 866 ± 473    | 4         |
| OscZOGT1  | LOC_Os04g46980 | 21 ± 0       | 57 ± 20      | 5         |
| OsNYC3*   | NM_001064128   | 3299 ± 189   | 5097 ± 959   | 6         |
| OsDOS     | NM_001048811   | 17 ± 12      | 15 ± 0       | 7         |
| OsDWARF3* | AK069429       | 242 ± 20     | 61 ± 17      | 8         |
| OsTDC1    | AK069031       | 20 ± 15      | 82 ± 17      | 9         |
| OsSPL28   | LOC_Os01g50770 | 2859 ± 296   | 2747 ± 267   | 10        |
| OsETR2*   | AF420319       | 776 ± 110    | 580 ± 10     | 11        |
| OsAkαGal* | AF251068       | 369 ± 171    | 5044 ± 1249  | 12        |
| OsGS1;3   | AB180689       | 33 ± 22      | 68 ± 11      | 13        |
| OsPHYB    | AB109892       | 5513 ± 623   | 2957 ± 186   | 14        |
| OsGS1;1   | AB037595       | 6045 ± 535   | 9738 ± 315   | 15        |
| OsNOE1    | LOC_Os03g03910 | 27930 ± 3278 | 24420 ± 1667 | 16        |
| OsNAP*    | LOC_Os03g21060 | 309 ± 69     | 4069 ± 1087  | 17        |
| OsWRKY42* | LOC_Os02g26430 | 22 ± 11      | 2160 ± 714   | 18        |
| OsNYC1*   | LOC_Os01g12710 | 10101 ± 400  | 5845 ± 252   | 19        |
| OsSWEET5  | LOC_Os05g51090 | 41 ± 19      | 56 ± 8       | 20        |
| OsCOI1b   | LOC_Os05g37690 | 6040 ± 81    | 5994 ± 761   | 21        |

## References

1. Park, S.Y., *et al.* The senescence-induced staygreen protein regulates chlorophyll degradation. *Plant Cell* **19**, 1649-1664 (2007).
2. Yamatani, H., *et al.* NYC4, the rice ortholog of Arabidopsis THF1, is involved in the degradation of chlorophyll protein complexes during leaf senescence. *Plant J* **74**, 652-662 (2013).
3. Sugunya, P., *et al.* Overexpression of OsRab7B3, a Small GTP-Binding Protein Gene, Enhances Leaf Senescence in Transgenic Rice. *Biosci Biotech Biochem* **76**, 1296-1302 (2012).
4. Jan, A., *et al.* OsTZF1, a CCCH-tandem zinc finger protein, confers delayed senescence and stress tolerance in rice by regulating stress-related genes. *Plant Physiol* **161**, 1202-1216 (2013).
5. Kudo, T., *et al.* Cytokinin activity of cis-zatin and phenotypic alterations induced by overexpression of putative cis-zeatin-O-glucosyltransferase in rice. *Plant Physiol* **160**, 319-331 (2012).
6. Morita, R., *et al.* Defect in non-yellow coloring 3, an alpha/beta hydrolase-fold family protein, causes a stay-green phenotype during leaf senescence in rice. *Plant J* **59**, 940-952 (2009).
7. Kong, Z.S., *et al.* A novel nuclear-localized CCCH-type zinc finger protein, OsDOS, is involved in delaying leaf senescence in rice. *Plant Physiol* **141**, 1376-1388 (2006).
8. Yan, H., *et al.* Rice tillering dwarf mutant dwarf3 has increased leaf longevity during darkness-induced senescence or hydrogen peroxide-induced cell death. *Genes Genet Syst* **82**, 361-366 (2007).
9. Kang, K., *et al.* Senescence-induced serotonin biosynthesis and its role in delaying senescence in rice leaves. *Plant Physiol* **150**, 1380-1393 (2009).
10. Qiao, Y., *et al.* SPL28 encodes a clathrin-associated adaptor protein complex 1, medium subunit  $\mu$ 1 (AP1M1) and is responsible for spotted leaf and early senescence in rice (*Oryza sativa*). *New Phytol* **185**, 258-274 (2010).
11. Wuriyangan, H., *et al.* The ethylene receptor ETR2 delays floral transition and affects starch accumulation in rice. *Plant Cell* **21**, 1473-1494 (2009).
12. Lee, R.H., *et al.* Alkaline alpha-galactosidase degrades thylakoid membranes in the chloroplast during leaf senescence in rice. *New Phytol* **184**, 596-606 (2009).
13. Cai, H.M., *et al.* Overexpressed glutamine synthetase gene modifies nitrogen metabolism and abiotic stress responses in rice. *Plant Cell Rep* **28**, 527-537 (2009).
14. Piao, W., *et al.* Rice Phytochrome B (OsPhyB) Negatively Regulates Dark-and Starvation-Induced Leaf Senescence. *Plants* **4**, 644-663 (2015)
15. Tabuchi, M., *et al.* Severe reduction in growth rate and grain filling of rice mutants lacking OsGS1;1, a cytosolic glutamine synthetase1;1. *Plant J* **42**, 641-651 (2005).

16. Lin, A.H., *et al.* Nitric Oxide and Protein S-Nitrosylation Are Integral to Hydrogen Peroxide-Induced Leaf Cell Death in Rice. *Plant Physiol* **158**, 451-464 (2012).
17. Liang, C.Z., *et al.* OsNAP connects abscisic acid and leaf senescence by fine-tuning abscisic acid biosynthesis and directly targeting senescence-associated genes in rice. *Proc Natl Acad Sci USA* **111**, 10013-10018 (2014).
18. Han, M., *et al.* OsWRKY42 Represses OsMT1d and Induces Reactive Oxygen Species and Leaf Senescence in Rice. *Mol Cells* **37**, 532-539 (2014).
19. Kusaba, M., *et al.* Rice NON-YELLOW COLORING1 Is Involved in Light-Harvesting Complex II and Grana Degradation during Leaf Senescence. *Plant Cell* **19**, 1362-1375 (2007).
20. Zhou, Y., *et al.* Overexpression of OsSWEET5 in Rice Causes Growth Retardation and Precocious Senescence. *Plos One* **9**, (2014).
21. Lee, S.H., *et al.* Mutation of *Oryza sativa* CORONATINE INSENSITIVE 1b (OsCOI1b) delays leaf senescence. *J Integr Plant Biol* **57**, 562-576 (2015).
